# Supplementary material for: Alcohol Intake and Prevalent Kidney Stone: The National Health and Nutrition Examination Survey 2007–2018
Source: Preprints.org preprint supplement (doi:10.20944/preprints202407.1756.v1), 2024-07-22
Supplement: Supplementary file 1 [file supplementary]

Supplemental Table 1. Multivariable regression models adjusting for total fluid intake (with contribution from alcohol added)

|  | Adjusted OR (95% CI) | p value |
| --- | --- | --- |
| Model 1: Type of alcohol |  |  |
| Never/Currently none | REF |  |
| Beer only | 0.76 (0.60-0.95) | 0.02 |
| Wine only | 0.75 (0.58-0.96) | 0.02 |
| Liquor only | 0.99 (0.69-1.42) | 0.97 |
| Model 2: Beer intake only |  |  |
| 0-<1g | REF |  |
| 1-≤ 14g | 1.41 (0.97-2.04) | 0.07 |
| >14-28g | 0.64 (0.42-0.99) | 0.045 |
| >28-56g | 0.59 (0.39-0.91) | 0.02 |
| >56g | 0.32 (0.19-0.55) | <0.001 |
| Model 3: Wine intake only |  |  |
| 0-<1g | REF |  |
| 1-≤ 14g | 1.15 (0.72-1.83) | 0.57 |
| >14-28g | 0.54 (0.36-0.81) | 0.003 |
| >28g | 0.84 (0.53-1.33) | 0.46 |
| Model 4: Liquor intake only |  |  |
| 0-<1g | REF |  |
| 1-≤ 28g | 1.16 (0.68-1.96) | 0.58 |
| >28g | 0.85 (0.56-1.29) | 0.44 |

Models were adjusted for demographics, BMI, histories of hypertension, diabetes, thiazide use, cigarette smoking, dietary intakes of calorie, protein, fluid from all sources, sodium, potassium, and calcium.
